# Supplementary material for: Energetic compounds consisting of 1,2,5- and 1,3,4-oxadiazole rings
Source: Royal Society of Chemistry journal article supplement (doi:10.1039/c5ta06898c), 2015-01-01
Supplement: c5ta06898c1.pdf [file c5ta06898c1.pdf]

## **Electronic Supplementary Information**

### **Energetic compounds consisting of 1,2,5- and 1,3,4-oxadiazole rings**

Yongxing Tang,<sup>a</sup> Chunlin He,<sup>a</sup> Lauren A. Mitchell,<sup>b</sup> Damon A. Parrish<sup>b</sup> and Jean'ne M. Shreeve<sup>\*a</sup>

[a] Department of Chemistry, University of Idaho, Moscow, Idaho 83844-2343, United States

[b] Naval Research Laboratory, 4555 Overlook Avenue, Washington, D.C. 20375, United States

|                                                                                                                         |            |
|-------------------------------------------------------------------------------------------------------------------------|------------|
| <b>Table of Contents</b>                                                                                                | <b>S2</b>  |
| Table S1 Crystal data and structure refinement for <b>1</b> , <b>2</b> ·H <sub>2</sub> O and <b>5</b> ·H <sub>2</sub> O | <b>S3</b>  |
| Table S2 Atomic coordinates and equivalent isotropic displacement parameters for <b>1</b>                               | <b>S4</b>  |
| Table S3 Bond lengths and angles for <b>1</b> .                                                                         | <b>S5</b>  |
| Table S4 Anisotropic displacement parameters for <b>1</b> .                                                             | <b>S6</b>  |
| Table S5 Hydrogen coordinates and isotropic displacement parameters for <b>1</b>                                        | <b>S7</b>  |
| Table S6 Torsion angles for <b>1</b>                                                                                    | <b>S8</b>  |
| Table S7 Hydrogen bonds for <b>1</b>                                                                                    | <b>S9</b>  |
| Table S8 Atomic coordinates and equivalent isotropic displacement parameters for <b>2</b> ·H <sub>2</sub> O             | <b>S10</b> |
| Table S9 Bond lengths and angles for <b>2</b> ·H <sub>2</sub> O.                                                        | <b>S11</b> |
| Table S10 Anisotropic displacement parameters for <b>2</b> ·H <sub>2</sub> O                                            | <b>S12</b> |
| Table S11 Hydrogen coordinates and isotropic displacement parameters for <b>2</b> ·H <sub>2</sub> O                     | <b>S13</b> |
| Table S12 Torsion angles for <b>2</b> ·H <sub>2</sub> O                                                                 | <b>S14</b> |
| Table S13 Hydrogen bonds for <b>2</b> ·H <sub>2</sub> O                                                                 | <b>S15</b> |
| Table S14 Atomic coordinates and equivalent isotropic displacement parameters for <b>5</b> ·H <sub>2</sub> O            | <b>S16</b> |
| Table S15 Bond lengths and angles for <b>5</b> ·H <sub>2</sub> O                                                        | <b>S17</b> |
| Table S16 Anisotropic displacement parameters for <b>5</b> ·H <sub>2</sub> O                                            | <b>S18</b> |
| Table S17 Hydrogen coordinates and isotropic displacement parameters for <b>5</b> ·H <sub>2</sub> O                     | <b>S18</b> |
| Table S18 Torsion angles for <b>5</b> ·H <sub>2</sub> O                                                                 | <b>S19</b> |
| Table S19 Hydrogen bonds for <b>5</b> ·H <sub>2</sub> O                                                                 | <b>S20</b> |
| Computational Details (Isodesmic Reactions)                                                                             | <b>S21</b> |

**Table S1.** Crystal data and structure refinement for **1**, **2**·H<sub>2</sub>O and **5**·H<sub>2</sub>O.

| Identification code                         | <b>1</b>                                                    | <b>2</b> ·H <sub>2</sub> O                                  | <b>5</b> ·H <sub>2</sub> O                                  |
|---------------------------------------------|-------------------------------------------------------------|-------------------------------------------------------------|-------------------------------------------------------------|
| CCDC number                                 | 1419914                                                     | 1419915                                                     | 1419916                                                     |
| Empirical formula                           | C <sub>4</sub> H <sub>4</sub> N <sub>6</sub> O <sub>2</sub> | C <sub>4</sub> H <sub>5</sub> N <sub>7</sub> O <sub>5</sub> | C <sub>4</sub> H <sub>8</sub> N <sub>8</sub> O <sub>6</sub> |
| Formula weight                              | 168.13                                                      | 231.15                                                      | 264.18                                                      |
| Temperature/K                               | 293(2) K                                                    | 296(2) K                                                    | 293(2) K                                                    |
| Crystal system                              | Monoclinic                                                  | Monoclinic                                                  | Monoclinic                                                  |
| Space group                                 | P2 <sub>1</sub> /c                                          | P2 <sub>1</sub> /n                                          | C2/c                                                        |
| a/Å                                         | 7.0958(2)                                                   | 6.5964(3)                                                   | 26.968(2)                                                   |
| b/Å                                         | 8.6167(2)                                                   | 7.4775(3)                                                   | 4.0185(3)                                                   |
| c/Å                                         | 11.0839(3)                                                  | 17.4904(7)                                                  | 18.7676(14)                                                 |
| α/°                                         | 90                                                          | 90                                                          | 90                                                          |
| β/°                                         | 102.3650(10)                                                | 97.043(2)                                                   | 99.579(5)                                                   |
| γ/°                                         | 90                                                          | 90                                                          | 90                                                          |
| Volume/Å <sup>3</sup>                       | 661.98(3)                                                   | 856.20(6)                                                   | 2005.5(3)                                                   |
| Z                                           | 4                                                           | 4                                                           | 8                                                           |
| ρ <sub>calc</sub> /g/cm <sup>3</sup>        | 1.687                                                       | 1.793                                                       | 1.750                                                       |
| μ/mm <sup>-1</sup>                          | 0.140                                                       | 0.163                                                       | 0.161                                                       |
| F(000)                                      | 344                                                         | 472                                                         | 1088                                                        |
| Crystal size/mm <sup>3</sup>                | 0.222 x 0.200 x 0.120                                       | 0.112 x 0.103 x 0.056                                       | 0.200 x 0.180 x 0.150                                       |
| 2θ range for data collection/°              | 3.764 to 26.440                                             | 3.188 to 26.426                                             | 1.532 to 26.480                                             |
| Index ranges                                | -8<=h<=8,<br>-10<=k<=10,<br>-13<=l<=13                      | -8<=h<=8,<br>-7<=k<=9,<br>-21<=l<=21                        | -33<=h<=33, -<br>5<=k<=5, -<br>18<=l<=23                    |
| Reflections collected                       | 6119                                                        | 7971                                                        | 9159                                                        |
| Independent reflections                     | 1355 [R <sub>(int)</sub> = 0.0144]                          | 1763 [R <sub>(int)</sub> = 0.0387]                          | 2031 [R <sub>int</sub> = 0.0604]                            |
| Data/restraints/parameters                  | 1355 / 0 / 121                                              | 1763 / 0 / 160                                              | 2031 / 5 / 181                                              |
| Goodness-of-fit on F <sup>2</sup>           | 1.065                                                       | 1.008                                                       | 1.081                                                       |
| Final R indexes [I>=2σ (I)]                 | R <sub>1</sub> = 0.0305,<br>wR <sub>2</sub> = 0.0858        | R <sub>1</sub> = 0.0363,<br>wR <sub>2</sub> = 0.0810        | R <sub>1</sub> = 0.0455,<br>wR <sub>2</sub> = 0.1107        |
| Final R indexes [all data]                  | R <sub>1</sub> = 0.0335,<br>wR <sub>2</sub> = 0.0887        | R <sub>1</sub> = 0.0691,<br>wR <sub>2</sub> = 0.0943        | R <sub>1</sub> = 0.0969,<br>wR <sub>2</sub> = 0.1598        |
| Largest diff. peak/hole / e Å <sup>-3</sup> | 0.194 and -0.225                                            | 0.221 and -0.159                                            | 0.240 and -0.259                                            |

**Table S2.** Atomic coordinates ( $\times 10^4$ ) and equivalent isotropic displacement parameters ( $\text{\AA}^2 \times 10^3$ ) for **1**.  $U(\text{eq})$  is defined as one third of the trace of the orthogonalized  $U^{ij}$  tensor.

|       | x       | y       | z        | U(eq) |
|-------|---------|---------|----------|-------|
| N(1)  | 4865(2) | 1091(1) | -1622(1) | 45(1) |
| C(2)  | 5819(2) | 2010(1) | -745(1)  | 32(1) |
| N(3)  | 6509(1) | 1690(1) | 420(1)   | 36(1) |
| N(4)  | 7392(1) | 3055(1) | 942(1)   | 35(1) |
| C(5)  | 7174(1) | 4065(1) | 71(1)    | 29(1) |
| O(6)  | 6177(1) | 3506(1) | -1038(1) | 31(1) |
| C(7)  | 7876(1) | 5642(1) | 179(1)   | 29(1) |
| N(8)  | 7520(2) | 6652(1) | -717(1)  | 38(1) |
| O(9)  | 8469(1) | 7980(1) | -254(1)  | 44(1) |
| N(10) | 9451(2) | 7769(1) | 972(1)   | 40(1) |
| C(11) | 9082(2) | 6336(1) | 1249(1)  | 32(1) |
| N(12) | 9788(2) | 5661(2) | 2337(1)  | 53(1) |

**Table S3.** Bond lengths [Å] and angles [°] for **1**.

---

|                     |            |
|---------------------|------------|
| N(1)-C(2)           | 1.3224(15) |
| N(1)-H(1A)          | 0.866(18)  |
| N(1)-H(1B)          | 0.854(18)  |
| C(2)-N(3)           | 1.3096(15) |
| C(2)-O(6)           | 1.3659(13) |
| N(3)-N(4)           | 1.3986(13) |
| N(4)-C(5)           | 1.2842(14) |
| C(5)-O(6)           | 1.3680(12) |
| C(5)-C(7)           | 1.4435(15) |
| C(7)-N(8)           | 1.3029(15) |
| C(7)-C(11)          | 1.4365(14) |
| N(8)-O(9)           | 1.3704(13) |
| O(9)-N(10)          | 1.3993(14) |
| N(10)-C(11)         | 1.3122(15) |
| C(11)-N(12)         | 1.3362(16) |
| N(12)-H(12A)        | 0.855(19)  |
| N(12)-H(12B)        | 0.826(19)  |
|                     |            |
| C(2)-N(1)-H(1A)     | 117.0(11)  |
| C(2)-N(1)-H(1B)     | 119.4(11)  |
| H(1A)-N(1)-H(1B)    | 120.8(15)  |
| N(3)-C(2)-N(1)      | 128.55(11) |
| N(3)-C(2)-O(6)      | 112.57(10) |
| N(1)-C(2)-O(6)      | 118.88(10) |
| C(2)-N(3)-N(4)      | 105.69(9)  |
| C(5)-N(4)-N(3)      | 106.73(9)  |
| N(4)-C(5)-O(6)      | 113.13(9)  |
| N(4)-C(5)-C(7)      | 126.30(10) |
| O(6)-C(5)-C(7)      | 120.58(9)  |
| C(2)-O(6)-C(5)      | 101.87(8)  |
| N(8)-C(7)-C(11)     | 109.58(10) |
| N(8)-C(7)-C(5)      | 123.95(10) |
| C(11)-C(7)-C(5)     | 126.45(10) |
| C(7)-N(8)-O(9)      | 105.83(9)  |
| N(8)-O(9)-N(10)     | 110.96(8)  |
| C(11)-N(10)-O(9)    | 105.47(9)  |
| N(10)-C(11)-N(12)   | 124.49(11) |
| N(10)-C(11)-C(7)    | 108.15(10) |
| N(12)-C(11)-C(7)    | 127.32(11) |
| C(11)-N(12)-H(12A)  | 118.2(12)  |
| C(11)-N(12)-H(12B)  | 118.4(13)  |
| H(12A)-N(12)-H(12B) | 121.6(18)  |

---

**Table S4.** Anisotropic displacement parameters ( $\text{\AA}^2 \times 10^3$ ) for **1**. The anisotropic displacement factor exponent takes the form:  $-2\pi^2 [ h^2 a^{*2} U^{11} + \dots + 2 h k a^* b^* U^{12} ]$

|       | U <sup>11</sup> | U <sup>22</sup> | U <sup>33</sup> | U <sup>23</sup> | U <sup>13</sup> | U <sup>12</sup> |
|-------|-----------------|-----------------|-----------------|-----------------|-----------------|-----------------|
| N(1)  | 61(1)           | 38(1)           | 31(1)           | 0(1)            | -6(1)           | -16(1)          |
| C(2)  | 33(1)           | 29(1)           | 31(1)           | 0(1)            | 2(1)            | -2(1)           |
| N(3)  | 42(1)           | 31(1)           | 31(1)           | 0(1)            | -2(1)           | -5(1)           |
| N(4)  | 39(1)           | 32(1)           | 29(1)           | -1(1)           | -2(1)           | -4(1)           |
| C(5)  | 28(1)           | 31(1)           | 26(1)           | -4(1)           | 1(1)            | 0(1)            |
| O(6)  | 35(1)           | 30(1)           | 26(1)           | -1(1)           | -2(1)           | -3(1)           |
| C(7)  | 28(1)           | 29(1)           | 28(1)           | -3(1)           | 4(1)            | 2(1)            |
| N(8)  | 43(1)           | 32(1)           | 36(1)           | 0(1)            | 0(1)            | -1(1)           |
| O(9)  | 55(1)           | 31(1)           | 42(1)           | 2(1)            | 2(1)            | -4(1)           |
| N(10) | 47(1)           | 33(1)           | 37(1)           | -4(1)           | 3(1)            | -4(1)           |
| C(11) | 36(1)           | 29(1)           | 31(1)           | -6(1)           | 6(1)            | 0(1)            |
| N(12) | 78(1)           | 42(1)           | 29(1)           | -2(1)           | -8(1)           | -14(1)          |

**Table S5.** Hydrogen coordinates ( $\times 10^4$ ) and isotropic displacement parameters ( $\text{\AA}^2 \times 10^3$ ) for **1**.

|        | x         | y        | z         | U(eq) |
|--------|-----------|----------|-----------|-------|
| H(1A)  | 4470(20)  | 210(20)  | -1390(16) | 55    |
| H(1B)  | 4370(20)  | 1471(19) | -2330(16) | 55    |
| H(12A) | 9330(20)  | 4780(20) | 2481(16)  | 63    |
| H(12B) | 10420(30) | 6190(20) | 2898(17)  | 63    |

**Table S6.** Torsion angles [°] for **1**.

---

|                        |             |
|------------------------|-------------|
| N(1)-C(2)-N(3)-N(4)    | 179.75(12)  |
| O(6)-C(2)-N(3)-N(4)    | -0.20(12)   |
| C(2)-N(3)-N(4)-C(5)    | -0.13(12)   |
| N(3)-N(4)-C(5)-O(6)    | 0.42(12)    |
| N(3)-N(4)-C(5)-C(7)    | -179.13(10) |
| N(3)-C(2)-O(6)-C(5)    | 0.42(12)    |
| N(1)-C(2)-O(6)-C(5)    | -179.53(11) |
| N(4)-C(5)-O(6)-C(2)    | -0.52(12)   |
| C(7)-C(5)-O(6)-C(2)    | 179.07(9)   |
| N(4)-C(5)-C(7)-N(8)    | -175.80(10) |
| O(6)-C(5)-C(7)-N(8)    | 4.68(16)    |
| N(4)-C(5)-C(7)-C(11)   | 5.48(18)    |
| O(6)-C(5)-C(7)-C(11)   | -174.04(9)  |
| C(11)-C(7)-N(8)-O(9)   | 0.17(12)    |
| C(5)-C(7)-N(8)-O(9)    | -178.74(10) |
| C(7)-N(8)-O(9)-N(10)   | 0.28(12)    |
| N(8)-O(9)-N(10)-C(11)  | -0.64(12)   |
| O(9)-N(10)-C(11)-N(12) | 178.61(12)  |
| O(9)-N(10)-C(11)-C(7)  | 0.71(12)    |
| N(8)-C(7)-C(11)-N(10)  | -0.59(13)   |
| C(5)-C(7)-C(11)-N(10)  | 178.29(10)  |
| N(8)-C(7)-C(11)-N(12)  | -178.41(12) |
| C(5)-C(7)-C(11)-N(12)  | 0.47(19)    |

---



**Table S7.** Hydrogen bonds for **1** [ $\text{\AA}$  and  $^\circ$ ].

| D-H...A                | d(D-H)    | d(H...A)  | d(D...A)   | $\angle(\text{DHA})$ |
|------------------------|-----------|-----------|------------|----------------------|
| N(1)-H(1A)...N(3)#1    | 0.866(18) | 2.154(18) | 3.0032(15) | 166.8(15)            |
| N(1)-H(1B)...N(8)#2    | 0.854(18) | 2.295(18) | 3.1081(15) | 159.4(15)            |
| N(12)-H(12A)...N(4)    | 0.855(19) | 2.450(18) | 3.0327(16) | 126.0(15)            |
| N(12)-H(12A)...N(10)#3 | 0.855(19) | 2.459(18) | 3.0949(16) | 131.8(15)            |
| N(12)-H(12B)...N(3)#4  | 0.826(19) | 2.579(19) | 3.3270(15) | 151.3(16)            |
| N(12)-H(12B)...N(4)#4  | 0.826(19) | 2.402(19) | 3.2035(15) | 164.0(16)            |

Symmetry transformations used to generate equivalent atoms:

#1  $-x+1, -y, -z$  #2  $-x+1, y-1/2, -z-1/2$  #3  $-x+2, y-1/2, -z+1/2$

#4  $-x+2, y+1/2, -z+1/2$

**Table S8.** Atomic coordinates ( $\times 10^4$ ) and equivalent isotropic displacement parameters ( $\text{\AA}^2 \times 10^3$ ) for  $2 \cdot \text{H}_2\text{O}$ .  $U(\text{eq})$  is defined as one third of the trace of the orthogonalized  $U^{ij}$  tensor.

|       | x        | y       | z       | U(eq) |
|-------|----------|---------|---------|-------|
| N(1)  | 13839(3) | 5064(3) | 7108(1) | 43(1) |
| C(2)  | 12237(3) | 4610(2) | 6647(1) | 32(1) |
| N(3)  | 11693(2) | 4962(2) | 5913(1) | 36(1) |
| N(4)  | 9826(2)  | 4176(2) | 5666(1) | 37(1) |
| C(5)  | 9354(3)  | 3393(3) | 6262(1) | 32(1) |
| O(6)  | 10788(2) | 3582(2) | 6897(1) | 35(1) |
| C(7)  | 7504(3)  | 2401(3) | 6338(1) | 33(1) |
| N(8)  | 7241(2)  | 1647(3) | 6987(1) | 45(1) |
| O(9)  | 5354(2)  | 877(2)  | 6861(1) | 52(1) |
| N(10) | 4431(2)  | 1177(2) | 6104(1) | 43(1) |
| C(11) | 5761(3)  | 2125(3) | 5774(1) | 33(1) |
| N(12) | 5683(2)  | 2825(2) | 5045(1) | 34(1) |
| N(13) | 3970(2)  | 2498(2) | 4576(1) | 39(1) |
| O(14) | 2548(2)  | 1587(2) | 4772(1) | 51(1) |
| O(15) | 3855(2)  | 3169(2) | 3919(1) | 56(1) |
| O(1S) | 9082(3)  | 976(3)  | 3640(1) | 58(1) |

**Table S9.** Bond lengths [Å] and angles [°] for 2·H<sub>2</sub>O.

---

|                   |            |                   |            |
|-------------------|------------|-------------------|------------|
| N(1)-C(2)         | 1.294(2)   | N(1)-H(1A)        | 0.89(2)    |
| N(1)-H(1B)        | 0.86(2)    | C(2)-N(3)         | 1.317(2)   |
| C(2)-O(6)         | 1.341(2)   | N(3)-N(4)         | 1.385(2)   |
| N(3)-H(3)         | 0.84(2)    | N(4)-C(5)         | 1.267(2)   |
| C(5)-O(6)         | 1.375(2)   | C(5)-C(7)         | 1.448(3)   |
| C(7)-N(8)         | 1.298(2)   | C(7)-C(11)        | 1.434(2)   |
| N(8)-O(9)         | 1.364(2)   | O(9)-N(10)        | 1.406(2)   |
| N(10)-C(11)       | 1.315(2)   | C(11)-N(12)       | 1.374(2)   |
| N(12)-N(13)       | 1.334(2)   | N(13)-O(14)       | 1.241(2)   |
| N(13)-O(15)       | 1.248(2)   | O(1S)-H(1S)       | 0.84(3)    |
| O(1S)-H(2S)       | 0.77(3)    |                   |            |
| <hr/>             |            |                   |            |
| C(2)-N(1)-H(1A)   | 116.5(14)  | C(2)-N(1)-H(1B)   | 114.1(14)  |
| H(1A)-N(1)-H(1B)  | 129(2)     | N(1)-C(2)-N(3)    | 131.30(19) |
| N(1)-C(2)-O(6)    | 120.48(16) | N(3)-C(2)-O(6)    | 108.22(15) |
| C(2)-N(3)-N(4)    | 110.15(16) | C(2)-N(3)-H(3)    | 129.2(14)  |
| N(4)-N(3)-H(3)    | 120.6(14)  | C(5)-N(4)-N(3)    | 103.83(14) |
| N(4)-C(5)-O(6)    | 113.73(16) | N(4)-C(5)-C(7)    | 127.34(16) |
| O(6)-C(5)-C(7)    | 118.91(15) | C(2)-O(6)-C(5)    | 104.06(13) |
| N(8)-C(7)-C(11)   | 110.87(16) | N(8)-C(7)-C(5)    | 120.44(16) |
| C(11)-C(7)-C(5)   | 128.67(16) | C(7)-N(8)-O(9)    | 105.03(15) |
| N(8)-O(9)-N(10)   | 111.47(13) | C(11)-N(10)-O(9)  | 105.26(15) |
| N(10)-C(11)-N(12) | 131.40(17) | N(10)-C(11)-C(7)  | 107.37(16) |
| N(12)-C(11)-C(7)  | 121.22(16) | N(13)-N(12)-C(11) | 115.63(15) |
| O(14)-N(13)-O(15) | 120.82(16) | O(14)-N(13)-N(12) | 122.88(16) |
| O(15)-N(13)-N(12) | 116.30(16) | H(1S)-O(1S)-H(2S) | 108(3)     |

---

**Table S10.** Anisotropic displacement parameters ( $\text{\AA}^2 \times 10^3$ ) for  $2 \cdot \text{H}_2\text{O}$ . The anisotropic displacement factor exponent takes the form:  $-2\pi^2 [ h^2 a^2 U^{11} + \dots + 2 h k a^* b^* U^{12} ]$

|       | U11   | U22   | U33   | U23    | U13   | U12    |
|-------|-------|-------|-------|--------|-------|--------|
| N(1)  | 42(1) | 52(1) | 33(1) | 0(1)   | -3(1) | -12(1) |
| C(2)  | 32(1) | 32(1) | 30(1) | -4(1)  | 0(1)  | 1(1)   |
| N(3)  | 33(1) | 43(1) | 30(1) | 4(1)   | -2(1) | -7(1)  |
| N(4)  | 32(1) | 46(1) | 33(1) | 5(1)   | -2(1) | -5(1)  |
| C(5)  | 30(1) | 39(1) | 26(1) | 0(1)   | -2(1) | 5(1)   |
| O(6)  | 32(1) | 44(1) | 27(1) | 1(1)   | -1(1) | -3(1)  |
| C(7)  | 31(1) | 37(1) | 32(1) | 3(1)   | 3(1)  | 3(1)   |
| N(8)  | 36(1) | 60(1) | 41(1) | 12(1)  | 4(1)  | -4(1)  |
| O(9)  | 42(1) | 70(1) | 43(1) | 19(1)  | 4(1)  | -10(1) |
| N(10) | 37(1) | 50(1) | 42(1) | 8(1)   | 2(1)  | -6(1)  |
| C(11) | 30(1) | 32(1) | 36(1) | 3(1)   | 6(1)  | 1(1)   |
| N(12) | 27(1) | 41(1) | 33(1) | 0(1)   | -4(1) | -4(1)  |
| N(13) | 33(1) | 47(1) | 37(1) | -6(1)  | 2(1)  | -2(1)  |
| O(14) | 34(1) | 68(1) | 49(1) | -3(1)  | 0(1)  | -17(1) |
| O(15) | 48(1) | 83(1) | 33(1) | 7(1)   | -6(1) | -7(1)  |
| O(1S) | 43(1) | 86(1) | 45(1) | -13(1) | -2(1) | -15(1) |

**Table S11.** Hydrogen coordinates ( $\times 10^4$ ) and isotropic displacement parameters ( $\text{\AA}^2 \times 10^3$ ) for  $2 \cdot \text{H}_2\text{O}$ .

|       | x         | y        | z        | U(eq) |
|-------|-----------|----------|----------|-------|
| H(1A) | 13900(30) | 4690(30) | 7592(13) | 51    |
| H(1B) | 14680(30) | 5740(30) | 6900(13) | 51    |
| H(3)  | 12300(30) | 5580(30) | 5607(12) | 43    |
| H(1S) | 8300(50)  | 400(40)  | 3889(17) | 88    |
| H(2S) | 10050(50) | 1200(40) | 3914(17) | 88    |

**Table S12.** Torsion angles [°] for **2**·H<sub>2</sub>O.

---

|                         |             |
|-------------------------|-------------|
| N(1)-C(2)-N(3)-N(4)     | 180.0(2)    |
| O(6)-C(2)-N(3)-N(4)     | 0.9(2)      |
| C(2)-N(3)-N(4)-C(5)     | -0.2(2)     |
| N(3)-N(4)-C(5)-O(6)     | -0.5(2)     |
| N(3)-N(4)-C(5)-C(7)     | 177.87(18)  |
| N(1)-C(2)-O(6)-C(5)     | 179.68(18)  |
| N(3)-C(2)-O(6)-C(5)     | -1.14(19)   |
| N(4)-C(5)-O(6)-C(2)     | 1.1(2)      |
| C(7)-C(5)-O(6)-C(2)     | -177.47(17) |
| N(4)-C(5)-C(7)-N(8)     | 179.2(2)    |
| O(6)-C(5)-C(7)-N(8)     | -2.5(3)     |
| N(4)-C(5)-C(7)-C(11)    | -2.4(3)     |
| O(6)-C(5)-C(7)-C(11)    | 175.87(18)  |
| C(11)-C(7)-N(8)-O(9)    | 0.1(2)      |
| C(5)-C(7)-N(8)-O(9)     | 178.69(17)  |
| C(7)-N(8)-O(9)-N(10)    | -0.1(2)     |
| N(8)-O(9)-N(10)-C(11)   | 0.0(2)      |
| O(9)-N(10)-C(11)-N(12)  | -178.97(19) |
| O(9)-N(10)-C(11)-C(7)   | 0.0(2)      |
| N(8)-C(7)-C(11)-N(10)   | -0.1(2)     |
| C(5)-C(7)-C(11)-N(10)   | -178.5(2)   |
| N(8)-C(7)-C(11)-N(12)   | 179.05(17)  |
| C(5)-C(7)-C(11)-N(12)   | 0.6(3)      |
| N(10)-C(11)-N(12)-N(13) | -0.3(3)     |
| C(7)-C(11)-N(12)-N(13)  | -179.13(17) |
| C(11)-N(12)-N(13)-O(14) | -1.6(3)     |
| C(11)-N(12)-N(13)-O(15) | 178.02(16)  |

---

**Table S13.** Hydrogen bonds for **2**·H<sub>2</sub>O [ $\text{\AA}$  and  $^\circ$ ].

| D-H...A               | d(D-H)  | d(H...A) | d(D...A) | $\angle(\text{DHA})$ |
|-----------------------|---------|----------|----------|----------------------|
| N(1)-H(1A)...O(1S)#1  | 0.89(2) | 1.89(2)  | 2.774(2) | 177(2)               |
| N(1)-H(1B)...O(15)#2  | 0.86(2) | 2.00(2)  | 2.821(3) | 159(2)               |
| N(3)-H(3)...N(12)#2   | 0.84(2) | 2.21(2)  | 3.041(2) | 170.7(19)            |
| O(1S)-H(1S)...N(10)#3 | 0.84(3) | 2.15(3)  | 2.901(2) | 149(3)               |
| O(1S)-H(2S)...O(14)#4 | 0.77(3) | 2.11(3)  | 2.872(2) | 172(3)               |

Symmetry transformations used to generate equivalent atoms:

#1  $x+1/2, -y+1/2, z+1/2$     #2  $-x+2, -y+1, -z+1$     #3  $-x+1, -y, -z+1$

#4  $x+1, y, z$

**Table S14.** Atomic coordinates ( $\times 10^4$ ) and equivalent isotropic displacement parameters ( $\text{\AA}^2 \times 10^3$ ) for  $5 \cdot \text{H}_2\text{O}$ .  $U(\text{eq})$  is defined as one third of the trace of the orthogonalized  $U^{ij}$  tensor.

|       | x       | y        | z       | U(eq) |
|-------|---------|----------|---------|-------|
| N(1)  | 3775(1) | 723(7)   | 4498(1) | 32(1) |
| N(2)  | 3853(1) | 725(7)   | 5252(1) | 34(1) |
| C(3)  | 4243(1) | -1148(8) | 5453(2) | 29(1) |
| O(4)  | 4439(1) | -2391(6) | 4886(1) | 30(1) |
| C(5)  | 4121(1) | -1113(8) | 4307(2) | 26(1) |
| C(6)  | 4200(1) | -1949(8) | 3583(2) | 27(1) |
| N(7)  | 4562(1) | -3888(7) | 3465(1) | 34(1) |
| O(8)  | 4518(1) | -4080(6) | 2726(1) | 42(1) |
| N(9)  | 4117(1) | -2144(7) | 2376(2) | 35(1) |
| C(10) | 3915(1) | -838(8)  | 2903(2) | 26(1) |
| N(11) | 4463(1) | -1884(8) | 6111(2) | 47(1) |
| N(12) | 3505(1) | 1208(7)  | 2897(1) | 29(1) |
| N(13) | 3264(1) | 2106(7)  | 2259(1) | 28(1) |
| O(14) | 2883(1) | 3924(6)  | 2261(1) | 39(1) |
| O(15) | 3397(1) | 1271(6)  | 1681(1) | 40(1) |
| O(1S) | 2825(1) | 6398(6)  | 4210(2) | 45(1) |
| N(2S) | 2770(1) | 3514(7)  | 3786(2) | 31(1) |
| O(3S) | 3033(1) | 5711(6)  | 557(1)  | 33(1) |



**Table S15.** Bond lengths [Å] and angles [°] for 5·H<sub>2</sub>O.

---

|                     |            |                     |            |
|---------------------|------------|---------------------|------------|
| N(1)-C(5)           | 1.285(4)   | N(1)-N(2)           | 1.396(4)   |
| N(2)-C(3)           | 1.297(4)   | C(3)-N(11)          | 1.311(4)   |
| C(3)-O(4)           | 1.359(4)   | O(4)-C(5)           | 1.369(4)   |
| C(5)-C(6)           | 1.448(4)   | C(6)-N(7)           | 1.297(4)   |
| C(6)-C(10)          | 1.446(4)   | N(7)-O(8)           | 1.374(3)   |
| O(8)-N(9)           | 1.403(3)   | N(9)-C(10)          | 1.317(4)   |
| C(10)-N(12)         | 1.375(4)   | N(11)-H(11A)        | 0.8600     |
| N(11)-H(11B)        | 0.8600     | N(12)-N(13)         | 1.315(3)   |
| N(13)-O(15)         | 1.244(3)   | N(13)-O(14)         | 1.260(3)   |
| O(1S)-N(2S)         | 1.400(4)   | O(1S)-H(1S)         | 0.98(4)    |
| N(2S)-H(2SA)        | 0.8800(11) | N(2S)-H(2SB)        | 0.8801(11) |
| N(2S)-H(2SC)        | 0.8801(11) | O(3S)-H(3SA)        | 0.8402(11) |
| O(3S)-H(3SB)        | 0.8402(11) |                     |            |
| <hr/>               |            |                     |            |
| C(5)-N(1)-N(2)      | 106.8(2)   | C(3)-N(2)-N(1)      | 105.8(2)   |
| N(2)-C(3)-N(11)     | 128.5(3)   | N(2)-C(3)-O(4)      | 112.8(3)   |
| N(11)-C(3)-O(4)     | 118.7(3)   | C(3)-O(4)-C(5)      | 102.1(2)   |
| N(1)-C(5)-O(4)      | 112.4(3)   | N(1)-C(5)-C(6)      | 128.4(3)   |
| O(4)-C(5)-C(6)      | 119.2(3)   | N(7)-C(6)-C(10)     | 109.9(3)   |
| N(7)-C(6)-C(5)      | 122.1(3)   | C(10)-C(6)-C(5)     | 128.0(3)   |
| C(6)-N(7)-O(8)      | 105.3(2)   | N(7)-O(8)-N(9)      | 112.0(2)   |
| C(10)-N(9)-O(8)     | 104.5(2)   | N(9)-C(10)-N(12)    | 131.6(3)   |
| N(9)-C(10)-C(6)     | 108.4(3)   | N(12)-C(10)-C(6)    | 120.0(3)   |
| C(3)-N(11)-H(11A)   | 120.0      | C(3)-N(11)-H(11B)   | 120.0      |
| H(11A)-N(11)-H(11B) | 120.0      | N(13)-N(12)-C(10)   | 116.6(3)   |
| O(15)-N(13)-O(14)   | 120.9(2)   | O(15)-N(13)-N(12)   | 123.3(3)   |
| O(14)-N(13)-N(12)   | 115.9(3)   | N(2S)-O(1S)-H(1S)   | 106(2)     |
| O(1S)-N(2S)-H(2SA)  | 112(2)     | O(1S)-N(2S)-H(2SB)  | 107(2)     |
| H(2SA)-N(2S)-H(2SB) | 120(3)     | O(1S)-N(2S)-H(2SC)  | 105(2)     |
| H(2SA)-N(2S)-H(2SC) | 113(3)     | H(2SB)-N(2S)-H(2SC) | 97(3)      |
| H(3SA)-O(3S)-H(3SB) | 81(3)      |                     |            |

---

**Table S16.** Anisotropic displacement parameters ( $\text{\AA}^2 \times 10^3$ ) for  $5 \cdot \text{H}_2\text{O}$ . The anisotropic displacement factor exponent takes the form:  $-2\pi^2 [ h^2 a^{*2} U^{11} + \dots + 2 h k a^* b^* U^{12} ]$

|       | U11   | U22   | U33   | U23   | U13   | U12   |
|-------|-------|-------|-------|-------|-------|-------|
| N(1)  | 33(2) | 41(2) | 22(2) | 2(1)  | 6(1)  | 9(1)  |
| N(2)  | 34(2) | 46(2) | 21(1) | 0(1)  | 4(1)  | 10(1) |
| C(3)  | 29(2) | 36(2) | 22(2) | -1(2) | 4(1)  | 4(1)  |
| O(4)  | 27(1) | 41(1) | 21(1) | 2(1)  | 2(1)  | 11(1) |
| C(5)  | 23(2) | 30(2) | 23(2) | 0(1)  | 1(1)  | 2(1)  |
| C(6)  | 26(2) | 30(2) | 27(2) | 4(1)  | 5(1)  | 0(1)  |
| N(7)  | 33(2) | 45(2) | 26(2) | 0(1)  | 9(1)  | 10(1) |
| O(8)  | 40(1) | 56(2) | 32(1) | 2(1)  | 15(1) | 19(1) |
| N(9)  | 39(2) | 44(2) | 25(2) | 0(1)  | 11(1) | 12(1) |
| C(10) | 28(2) | 30(2) | 21(2) | 1(1)  | 8(1)  | -3(1) |
| N(11) | 43(2) | 70(2) | 24(2) | -2(2) | -2(1) | 24(2) |
| N(12) | 28(1) | 37(2) | 20(1) | 4(1)  | 2(1)  | 9(1)  |
| N(13) | 31(2) | 34(2) | 20(2) | 1(1)  | 2(1)  | 2(1)  |
| O(14) | 35(1) | 52(2) | 29(1) | 6(1)  | 0(1)  | 14(1) |
| O(15) | 52(2) | 51(2) | 18(1) | 1(1)  | 6(1)  | 12(1) |
| O(1S) | 69(2) | 27(1) | 36(2) | -2(1) | -1(1) | 3(1)  |
| N(2S) | 29(2) | 31(2) | 34(2) | -4(1) | 4(1)  | 5(1)  |
| O(3S) | 31(1) | 42(1) | 26(1) | 5(1)  | 2(1)  | -5(1) |

**Table S17.** Hydrogen coordinates ( $\times 10^4$ ) and isotropic displacement parameters ( $\text{\AA}^2 \times 10^3$ ) for  $5 \cdot \text{H}_2\text{O}$ .

|        | x        | y         | z        | U(eq) |
|--------|----------|-----------|----------|-------|
| H(11A) | 4348     | -1083     | 6476     | 56    |
| H(11B) | 4722     | -3166     | 6177     | 56    |
| H(1S)  | 2910(14) | 5630(100) | 4710(20) | 54    |
| H(2SA) | 3049(6)  | 2340(60)  | 3836(18) | 38    |
| H(2SB) | 2486(6)  | 2560(70)  | 3846(18) | 38    |
| H(2SC) | 2670(12) | 4220(80)  | 3341(6)  | 38    |
| H(3SA) | 3316(5)  | 6630(70)  | 650(20)  | 40    |
| H(3SB) | 3166(12) | 4500(60)  | 901(11)  | 40    |

**Table S18.** Torsion angles [°] for **5**·H<sub>2</sub>O.

---

|                         |           |
|-------------------------|-----------|
| C(5)-N(1)-N(2)-C(3)     | -0.2(4)   |
| N(1)-N(2)-C(3)-N(11)    | 179.4(4)  |
| N(1)-N(2)-C(3)-O(4)     | 0.7(4)    |
| N(2)-C(3)-O(4)-C(5)     | -0.9(3)   |
| N(11)-C(3)-O(4)-C(5)    | -179.7(3) |
| N(2)-N(1)-C(5)-O(4)     | -0.3(4)   |
| N(2)-N(1)-C(5)-C(6)     | 179.0(3)  |
| C(3)-O(4)-C(5)-N(1)     | 0.7(4)    |
| C(3)-O(4)-C(5)-C(6)     | -178.7(3) |
| N(1)-C(5)-C(6)-N(7)     | -178.9(3) |
| O(4)-C(5)-C(6)-N(7)     | 0.3(5)    |
| N(1)-C(5)-C(6)-C(10)    | 1.8(6)    |
| O(4)-C(5)-C(6)-C(10)    | -179.0(3) |
| C(10)-C(6)-N(7)-O(8)    | -0.4(4)   |
| C(5)-C(6)-N(7)-O(8)     | -179.8(3) |
| C(6)-N(7)-O(8)-N(9)     | 1.0(3)    |
| N(7)-O(8)-N(9)-C(10)    | -1.2(3)   |
| O(8)-N(9)-C(10)-N(12)   | -178.2(3) |
| O(8)-N(9)-C(10)-C(6)    | 0.9(3)    |
| N(7)-C(6)-C(10)-N(9)    | -0.3(4)   |
| C(5)-C(6)-C(10)-N(9)    | 179.0(3)  |
| N(7)-C(6)-C(10)-N(12)   | 178.9(3)  |
| C(5)-C(6)-C(10)-N(12)   | -1.8(5)   |
| N(9)-C(10)-N(12)-N(13)  | -0.7(5)   |
| C(6)-C(10)-N(12)-N(13)  | -179.8(3) |
| C(10)-N(12)-N(13)-O(15) | -2.0(4)   |
| C(10)-N(12)-N(13)-O(14) | 178.6(3)  |

---

**Table S19.** Hydrogen bonds for **5**·H<sub>2</sub>O [Å and °].

| D-H...A                 | d(D-H)     | d(H...A)  | d(D...A) | <(DHA) |
|-------------------------|------------|-----------|----------|--------|
| N(11)-H(11A)...N(9)#1   | 0.86       | 2.30      | 3.140(4) | 167.2  |
| N(11)-H(11B)...N(7)#2   | 0.86       | 2.27      | 3.121(4) | 170.3  |
| O(1S)-H(1S)...O(3S)#3   | 0.98(4)    | 1.65(5)   | 2.637(3) | 178(4) |
| N(2S)-H(2SA)...N(1)     | 0.8800(11) | 2.234(17) | 3.031(4) | 150(3) |
| N(2S)-H(2SB)...O(3S)#40 | 0.8801(11) | 2.071(15) | 2.892(4) | 155(3) |
| N(2S)-H(2SC)...O(14)    | 0.8801(11) | 2.20(2)   | 2.933(4) | 140(3) |
| O(3S)-H(3SA)...N(2)#50  | 0.8402(11) | 2.04(2)   | 2.773(3) | 146(3) |
| O(3S)-H(3SB)...O(15)    | 0.8402(11) | 1.977(5)  | 2.812(3) | 172(3) |

Symmetry transformations used to generate equivalent atoms:

#1 x,-y,z+1/2    #2 -x+1,-y-1,-z+1    #3 x,-y+1,z+1/2

#4 -x+1/2,y-1/2,-z+1/2    #5 x,-y+1,z-1/2

## Computational Details

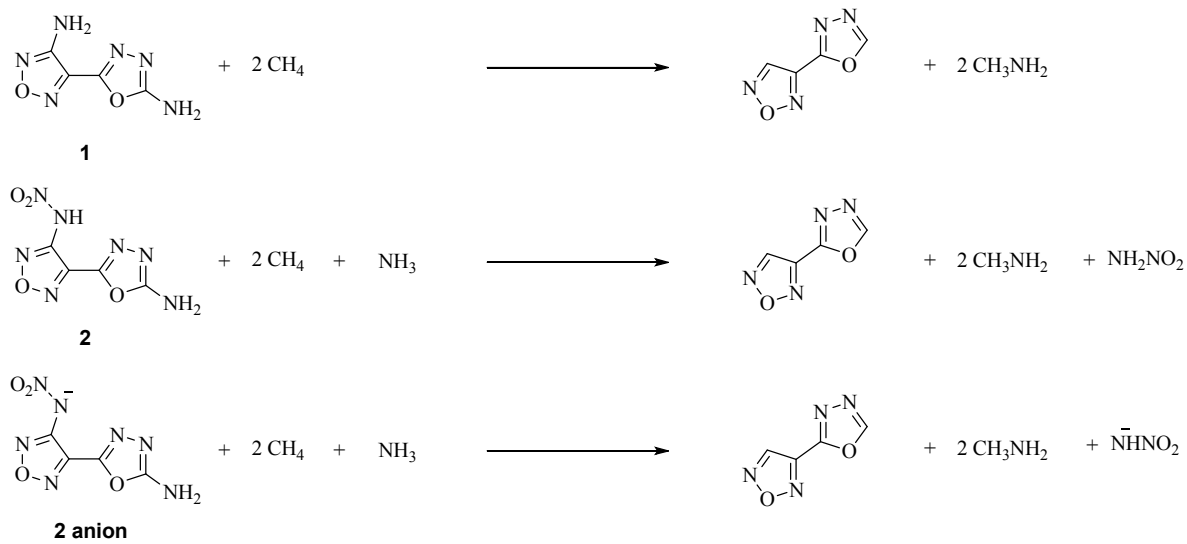

**Scheme S1.** Isodesmic reactions for **1**, **2** and **2 anion**
